# Supplementary material for: Applications of Machine Learning in Palliative Care: A Systematic Review
Source: Cancers (Basel). 2023 Mar 4;15(5):1596. doi: 10.3390/cancers15051596 (PMC10001037; doi:10.3390/cancers15051596)
Supplement: Supplementary file 1 [file cancers-15-01596-s001.zip › Supp_Table S1.pdf]

| Authors            | Title                                                                                                                                                                 | Year | Reason for Exclusion                             |
|--------------------|-----------------------------------------------------------------------------------------------------------------------------------------------------------------------|------|--------------------------------------------------|
| Parikh et al.      | Clinician perspectives on machine learning prognostic algorithms in the routine care of patients with cancer: a qualitative study                                     | 2022 | No ML focus (meta-research)                      |
| Ruiz et al.        | Early prediction of clinical deterioration using data-driven machine-learning modeling of electronic health records                                                   | 2021 | No human palliative care focus (cardiac surgery) |
| Tan et al.         | Personalised, Rational, Efficacy-Driven Cancer Drug Dosing via an Artificial Intelligence SystEm (PRECISE): A Protocol for the PRECISE CURATE.AI Pilot Clinical Trial | 2021 | No original article (protocol)                   |
| Bao et al.         | CEUS-Based Radiomics Can Show Changes in Protein Levels in Liver Metastases After Incomplete Thermal Ablation                                                         | 2021 | No human palliative care focus (mice)            |
| Secunda et al.     | Evaluation of automated specialty palliative care in the intensive care unit: A retrospective cohort study                                                            | 2021 | No ML focus                                      |
| Elboga et al.      | An automated synthesis of <sup>177</sup> Lu-EDTMP as an efficient bone-seeking therapeutic radiopharmaceutical                                                        | 2021 | No ML focus                                      |
| De Panfilis et al. | AI-based clinical decision-making systems in palliative medicine: ethical challenges                                                                                  | 2021 | No original article (review)                     |
| Rusin et al.       | Automated Prediction of Cardiorespiratory Deterioration in Patients With Single Ventricle                                                                             | 2021 | No human palliative care focus (cardiac surgery) |
| Bange et al.       | Implementing automated prognostic models to inform palliative care: more than just the algorithm                                                                      | 2021 | No original article (editorial)                  |
| Wegier et al.      | mHOMR: a prospective observational study of an automated mortality prediction model to identify patients with unmet palliative needs                                  | 2021 | No ML focus                                      |
| Torenholt et al.   | Between a logic of disruption and a logic of continuation: Negotiating the legitimacy of algorithms used in automated clinical decision-making                        | 2021 | No original article (editorial)                  |
| Saunders et al.    | mHOMR: the acceptability of an automated mortality prediction model for timely identification of patients for palliative care                                         | 2021 | No ML focus                                      |
| Peruselli et al.   | Artificial intelligence and palliative care: opportunities and limitations                                                                                            | 2020 | No original article (editorial)                  |
| Mehta et al.       | Effectiveness of Radiofrequency Ablation in the Treatment of Painful Osseous Metastases: A Correlation Meta-Analysis with Machine Learning Cluster Identification     | 2020 | No original article (meta-analysis)              |
| Linnen et al.      | Postimplementation Evaluation of a Machine Learning-Based Deterioration Risk Alert to Enhance Sepsis Outcome Improvements                                             | 2020 | No human palliative care focus (infectiology)    |

|                  |                                                                                                                                                                                                                            |      |                                                                   |
|------------------|----------------------------------------------------------------------------------------------------------------------------------------------------------------------------------------------------------------------------|------|-------------------------------------------------------------------|
| Kim et al.       | Artificial intelligence and lung cancer treatment decision: agreement with recommendation of multidisciplinary tumor board                                                                                                 | 2020 | No human palliative care focus (oncology)                         |
| Greenwald et al. | Implementing Automated Triggers to Identify Hospitalized Patients with Possible Unmet Palliative Needs: Assessing the Impact of This Systems Approach on Clinicians                                                        | 2020 | No ML focus                                                       |
| Ibragimov et al. | Deep learning for identification of critical regions associated with toxicities after liver stereotactic body radiation therapy                                                                                            | 2020 | No human palliative care focus (radiation oncology)               |
| Windisch et al.  | Leveraging Advances in Artificial Intelligence to Improve the Quality and Timing of Palliative Care                                                                                                                        | 2020 | No original article (editorial)                                   |
| Ashiqur et al.   | Deep learning for biological age estimation                                                                                                                                                                                | 2020 | No original article (review)                                      |
| Thaker et al.    | Automated Big Data Analytics for the Radiation Oncology Alternative Payment Model Proposal Using a Novel Health Care Software Technology                                                                                   | 2020 | No human palliative care focus (radiation oncology reimbursement) |
| Storick et al.   | Improving palliative and end-of-life care with machine learning and routine data: a rapid review                                                                                                                           | 2019 | No original article (review)                                      |
| Lovo et al.      | Automated Stereotactic Gamma Ray Radiosurgery to the Pituitary Gland in Terminally Ill Cancer Patients with Opioid Refractory Pain                                                                                         | 2019 | No human palliative care focus (radiation oncology)               |
| Xiao et al.      | Comparison of the MAID (AI) and CAV/IE regimens with the predictive value of cyclic AMP-responsive element-binding protein 3 like protein 1 (CREB3L1) in palliative chemotherapy for advanced soft-tissue sarcoma patients | 2019 | No ML focus                                                       |
| Wegier et al.    | mHOMR: a feasibility study of an automated system for identifying inpatients having an elevated risk of 1-year mortality                                                                                                   | 2019 | No ML focus                                                       |
| Karadaghy et al. | Development and Assessment of a Machine Learning Model to Help Predict Survival Among Patients With Oral Squamous Cell Carcinoma                                                                                           | 2019 | No human palliative care focus (oncology)                         |
| Trebeschi et al. | Predicting response to cancer immunotherapy using noninvasive radiomic biomarkers                                                                                                                                          | 2019 | No human palliative care focus (oncology)                         |
| Picker et al.    | A Randomized Trial of Palliative Care Discussions Linked to an Automated Early Warning System Alert                                                                                                                        | 2017 | No ML focus                                                       |
| Meckel et al.    | Development of a [177Lu]BPAMD labeling kit and an automated synthesis module for routine bone targeted endoradiotherapy                                                                                                    | 2015 | No ML focus                                                       |
| Cheng et al.     | Correlation of apolipoprotein A-I kinetics with survival and response to first-line platinum-based chemotherapy in advanced non-small cell lung cancer                                                                     | 2015 | No ML focus                                                       |

|                    |                                                                                                                                                                      |      |                                             |
|--------------------|----------------------------------------------------------------------------------------------------------------------------------------------------------------------|------|---------------------------------------------|
| Chen et al.        | Automated Assessment of Medical Students' Clinical Exposures according to AAMC Geriatric Competencies                                                                | 2014 | No human palliative care focus (geriatrics) |
| Oliver et al.      | A Brazilian experience in assisted automated peritoneal dialysis: reliable option or just a palliative therapy?                                                      | 2013 | No ML focus                                 |
| Ladjevardi et al.  | Treatment with curative intent and survival in men with high-risk prostate cancer. A population-based study of 11 380 men with serum PSA level 20-100 ng/mL          | 2013 | No ML focus                                 |
| Cross et al.       | Single-ventricle palliation for high-risk neonates: examining the feasibility of an automated home monitoring system after stage I palliation                        | 2012 | No ML focus                                 |
| Venzin et al.      | Symptomatic treatment of ascites with a peritoneo-vesical automated fluid shunt system in a dog                                                                      | 2012 | No human palliative care focus (dog)        |
| Giacomotto et al.  | Caenorhabditis elegans as a chemical screening tool for the study of neuromuscular disorders. Manual and semi-automated methods                                      | 2012 | No ML focus                                 |
| Thompson et al.    | Review article: the new concept of interventional heart failure therapy--part 1: electrical therapy, treatment of CAD, fluid removal, and ventricular support        | 2010 | No original article (review)                |
| Musshoff et al.    | An automated and fully validated LC-MS/MS procedure for the simultaneous determination of 11 opioids used in palliative care, with 5 of their metabolites            | 2006 | No ML focus                                 |
| Whittington et al. | Application of a statistics-based expert system to provide automated second opinions prior to elective surgery                                                       | 1993 | No ML focus                                 |
| Bateman et al.     | Palliation of cancer in human patients by maintenance therapy with NN'N"-triethylene thiophosphoramidate and N-(3-oxapentamethylene)-N'N"-diethylene phosphoramidate | 1958 | No ML focus                                 |
