# Supplementary material for: Applications of Machine Learning in Palliative Care: A Systematic Review
Source: Cancers (Basel). 2023 Mar 4;15(5):1596. doi: 10.3390/cancers15051596 (PMC10001037; doi:10.3390/cancers15051596)
Supplement: Supplementary file 1 [file cancers-15-01596-s001.zip › Supp_Table S2.xlsx]

## Sheet: Sheet1
Title	Author	Year	Recruitment Duration of Data	No. of data points	Split	Design	Task	Diseases	Ground truth	Features used for prediction	Target metric	Model	Software	Hardware	Code availability	Data availability	Conflict of interest	Funding
Improving palliative care with deep learning	Avati et al. [8]	2018	1990-2014	205'571 patients (164'424 training, 20'619 validation, 20'528 testing)	Random	Retrospective	Predicting a patients mortality within 3-12 months using EHR data from the previous 12 months	Disease agnostic	Date of death	ICD9 codes, CPT codes, RXCUI prescription codes, encounters, age, gender, race, ethnicity	Area under precision-recall curve: 0.69	Fully connected deep neural network	Python (v. 2.7), PyTorch, scikit-learn (v. 0.17.1)	NVIDIA TitanX (12 GB RAM)	Not mentioned	Not mentioned (only info is that data is from Stanford University Clinical Data Warehouse)	None	Publication costs were funded by grant GCDDG
Development and validation of 15-month mortality prediction models: a retrospective observational comparison of machine-learning techniques in a national sample of Medicare recipients	Berg et al. [14]	2019	2014-2015	2.7 million beneficiaries (1.35 million training, 1.35 million validation)	Random	Retrospective	Predicting 15-month mortality among community-dwelling Medicare beneficiaries	Disease agnostic	Date of death	Charlson condition indicators, Charlson score, AHRQ’s clinical classification software condition/procedure indicators, Age and gender categories, Medical service utilisation groups, Long-term care indicator, Hospice indicator, Palliative care indicator, HMO indicator	c-statistic: 0.798 for the best models (logistic regressions)	Naïve Bayes, decision tree with adap- tive boosting, logistic regression, neural network, least absolute shrinkage and selection operator (LASSO) and support vector machines	Not mentioned	Not mentioned	Not mentioned	Data is available for purchase by the Centres for Medicare & Medicaid Services (CMS)	None	None
Design of 1-year mortality forecast at hospital admission: A machine learning approach	Blanes-Selva et al. [15]	2021	2014-2017	65'279 episodes	Random	Retrospective	Predicting 1-year mortality for patients admitted to a hospital	Disease agnostic	Date of death	Lab results, information about admission, diseases, sex, age, Charlson index, Barthel tests	Area under the receiver operating characteristic curve: 0.91 for the best model (gradient boosting classifier)	Gradient Boosting Classifier, Random Forest, K-Nearest Neighbors, Multilayer Perceptron (MLP), Support Vector Machine	Python, scikit-learn, Keras, Tensorflow	Not mentioned	Not mentioned	Not mentioned	None	InAdvance project
Machine Learning Algorithms to Predict Mortality and Allocate Palliative Care for Older Patients with Hip Fracture	Cary et al. [9]	2021	2014-2015	17'140 patients (no dedicated sets, 10-fold cross validation)	None	Retrospective	Predict 30-day and 1-year mortality in patients > 65 years treated for hip fracture at an inpatient rehabilitation facility	Hip fracture	Date of death	Age, race, ethnicity, sex, co-habitation, eight chronic conditions, Functional Independent Measure score, length of stay	Area under the receiver operating characteristic curve: 0.760 (logistic regression/30 days); 0.765 (multilayer perceptron/30 days); 0.756 (logistic regression/one year); 0.758 (multilayer perceptron/one year)	Logistic regression, multilayer perceptron	Python (v. 3.7)	Not mentioned	Not mentioned	Not mentioned	Not mentioned	National Center for Advancing Translational Sciences of the National Institutes of Health; National Institute on Aging
Identifying Connectional Silence in Palliative Care Consultations: A Tandem Machine-Learning and Human Coding Method	Durieux et al. [23]	2018	2014-2016	1'000 clips from 354 consultations of 231 patients (1175 snippets from 60 conversations for training, 260 min from 6 full conversations for testing)	Random	Retrospective	Predicting conversational pauses in palliative care conversations so that human coders could clasify the pauses as connectional or not	Disease agnostic	Conversation pause as agreed upon by three human coders	17 audio features (Mel Frequency Cepstral Coefficients, zero crossing rate, energy, energy entropy, spectral entropy)	Accuracy: 0.944, Sensitivity: 0.908, Specificity: 0.945	Random forest classifier	Not mentioned	3.2 GHz Intel Core i5	Not mentioned	Not mentioned	None	American Cancer Society, Holly & Bob Miller Endowed Chair in Palliative Medicine at the Larner College of Medicine at the University of Vermont, College of Engineering & Mathematical Sciences at the University of Vermont
Development and Application of a Machine Learning Approach to Assess Short-term Mortality Risk Among Patients With Cancer Starting Chemotherapy	Elfiky et al. [16]	2018	2004-2014	26'946 patients (17'832 for training, 9'114 for validation)	Time	Retrospective	Predicting 30-day mortality of cancer patients undergoing chemotherapy	Cancer	Date of death	Demographics, prescribed medications, comorbidities, procedures, use of health care resources, vital signs, laboratory results, physician notes (analyzed using NLP)	Area under the receiver operating characteristic curve: 0.940	Gradient-boosted trees	R, xgboost	Not mentioned	Link is provided but did not work (http://labsysmed.org/wp-content/uploads/2017/02/ChemoMortalityAnalysis.rtf)	Not mentioned	Personal fees from GNS Healthcare outside of submitted work	Office of the Director, National Institute on Aging, Dana-Farber Cancer Institute
External Validation of the Bone Metastases Ensemble Trees for Survival (BMETS) Machine Learning Model to Predict Survival in Patients With Symptomatic Bone Metastases	Elledge et al. [20]	2021	2007 - 2013 for trainig, 2013-2016 for external validation, 20018 for internal validation	397 patients for training, 85 patients for internal validation, 182 patients for external validation	Entirely seperate cohort	Retrospective	Predicting survival in patients receiving palliative radiation for symptomatic bone metastases	Cancer	Date of death	Patient-specific factors, disease-specific factors, treatment-specific factors,	Time-dependent area under the curve at 3, 6, and 12 months: 0.82, 0.77, and 0.77	Random survival forests	R (v. 3.5.1)	Not mentioned	Not mentioned	From the corressponding author upon request	Various employments, stock ownership and reserach funding	Not mentioned
Machine Learning Methods to Extract Documentation of Breast Cancer Symptoms From Electronic Health Records	Forsyth et al. [26]	2018	1996-2015	10'000 sentences (8'000 for training, 2'000 for testing)	Random	Retrospective	Extracting patient-reported symptoms from free-text health records of breast cancer patients receiving chemotherapy	Breast cancer	Symptoms manually classified by human encoders	Bias term, lower-case word, last three characters of the word, last two characters of the word, whether the word was title-case, whether the word was a number, lower-case previous word, whether the previous word was upper-case and whether the previous word was title-case or the ‘‘beginning of a sentence’’ tag	Precision of 0.82, 0.86, and 0.99 and recall of 0.56, 0.69, and 1.00 for positive, negative, and neutral symptom labels	Conditional random field model	Python, Natural Language Toolkit, pycrf	Not mentioned	Not mentioned	Not mentioned	None	National Palliative Care Research Center, National Institute of Nursing Research
Automated Survival Prediction in Metastatic Cancer Patients Using High-Dimensional Electronic Medical Record Data	Gensheimer et al. [7]	2019	2008-2017	12'588 patients (10'070 patients for training, 2'518 patients for testing)	Random	Retrospective	Predicting survival from date of first visit after metastastic cancer diagnosis	Metastatic cancer	Date of death	Laboratory values, vital signs, ICD-9 diagnosis codes, CPT procedure codes, medication admin- istrations and prescriptions, and the text of inpatient and out- patient provider notes (analyzed using a bag-of-words approach)	C-index: 0.786 (averaged across landmark times)	Regularized Cox model	R, glmnet, rms, survivalROC	Not mentioned	https://github.com/MGensheimer/prognosis-model	Not mentioned (simulated data is available from github repo)	Research funding from Varian Medical Systems and Philips Healthcare, stock ownership in ViewRay	National Cancer Institute, National Institutes of Health/National Center for Research Resources
Optimal multiparametric set-up modelled for best survival outcomes in palliative treatment of liver malignancies: unsupervised machine learning and 3 PM recommendations	Goldstein et al. [10]	2020	Not mentioned	108 patients	None	Retrospective	Clustering patients with liver malignancies according to their survival probability	Primary and secondary liver malignancies	Date of death	Demographic information, type of malignancy, treatment, comet assay, expression patterns of several proteins	Significant survival difference between worst/intermediate vs. best subgroup (p = 0.00053)	Consensus hierarchical clustering	R and packages (survival, ConsensusClusterPlus)	Not mentioned	Not mentioned	Not mentioned	None	Projekt DEAL, NRW(Germany)/Israeli programme for academic exchange
Prediction of Lung Infection during Palliative Chemotherapy of Lung Cancer Based on Artificial Neural Network	Guo, Gao et al. [28]	2022	2019	80 patients	Not mentioned	Retrospective	Predicting lung infections in lung cancer patients undergoing palliative chemotherapy	Advanced lung cancer	Not mentioned	Age, sex, smoking index, TNM stage, pathological classification, basic diseases, chemotherapy cycle, chemotherapy plan, inva- sive operation, lung cancer surgery history, radiotherapy his- tory, leukocyte and albumin, adverse reactions after chemotherapy, hormone that should be used, antibiotics, and hospitalization time	Area under the receiver operating characteristic curve: 0.729 (logistic regression); 0.897 (neural network)	Linear regression and three-layer feedforward artificial BP neural network	Not mentioned	Not mentioned	Not mentioned	From the corressponding author upon request	None	Not mentioned
Improving Machine Learning 30-Day Mortality Prediction by Discounting Surprising Deaths	Heyman et al. [17]	2021	2015-2016	120,940 patient visits (65'776 visits for training and 55'164 visits for testing)	By hospital	Retrospective	Predicting 30-day mortality upon emergency department discharge	Disease agnostic	Date of death	Age, sex, comorbid- ity score, arrival by ambulance, referred by physician, triage priority 1, triage priority 2, imaging during ED visit, patient leaving against medical advice, discharge at nighttime, discharge at weekend, discharge at summer, discharge at winter, male physician (or male nurse in non- physician visits), non-physician provider, junior physi- cian, ED census, and hospital bed occ…	Area under the receiver operating characteristic curve: 0.950 (best model, logistic regression, unsurprising deaths); 0.931 (best model, support vector macines, all deaths)	Logistic regression, Random forest, Support vector machine	Python, scikit-learn	Not mentioned	Not mentioned	Not mentioned	Not mentioned	Not mentioned
Identifying Goals of Care Conversations in the Electronic Health Record Using Natural Language Processing and Machine Learning	Lee et al. [27]	2020	2008-2016	3'183 notes (80% for training, 20% for testing)	Random	Retrospective	Identifying goals of care conversation in notes in the electronic health record of patients with a critical illness and/or receiving palliative care	Disease agnostic	Goals of care conversation as classified by human encoders	Not specified	Mean sensitivity: 82.3%, mean specificity: 97.4%, mean area under the receiver operating characteristic curve: 0.94	NLP + logistic regression	Python (v3.6), nltk (v3.2.4), scikit-learn (v0.19.0)	Not mentioned	Not mentioned	Not mentioned	None	Cambia Health Foundation, UW Medicine, National Heart, Lung, and Blood Institute
Machine-Learning Monitoring System for Predicting Mortality Among Patients With Noncancer End-Stage Liver Disease: Retrospective Study	Lin et al. [18]	2020	Not mentioned	(907patients for training, 643 patients for validation)	By hospital	Retrospective	Predicting survival in patients with non-cancer end-stage liver disease	Non-cancer end-stage liver disease	Date of death	Sex, age, ammonia, albumin, blood urea nitrogen (BUN), complete blood count, C-reactive protein (CRP), creatinine, glutamic-pyruvic transaminase, prothrombin time (PT) and international normalized ratio (INR), glutamic-oxaloacetic transaminase, serum sodium, serum potassium, and total bilirubin	C-statistic: 0.852 for the best model (Random forest)	Linear discriminant analysis, support vector machine, naive Bayes classifier, decision tree, random forest, adaptive boosting	R (v. 3.6.1), SAS Enterprise Guide (v. 7.1), MASS	Not mentioned	Not mentioned	Not mentioned	None	Ministry of Education of Taiwan
Use of machine learning to transform complex standardized nursing care plan data into meaningful research variables: a palliative care exemplar	Macieira et al. [25]	2021	3 years (exact years not mentioned)	1000 DIOs (groups of diagnosis, intervention and outcome); 2/3 for training 1/3 for validation	Random	Retrospective	Classifying DIOs (groups of diagnosis, intervention and outcome) into a palliative care framework for hospitalized patients receiving palliative care	Disease agnostic	Manual classification by two human coders	Domains from NANDA International, Nursing Outcomes/Interventions Classification	Accuracy: 0.89 for the best model	Random forest classifier	R (v. 3.6.3)	Not mentioned	Not mentioned	From the corressponding author upon request	None	National Institute of Health, National Institute of Nursing Research, National Institute of Aging
Automated Detection of Conversational Pauses from Audio Recordings of Serious Illness Conversations in Natural Hospital Settings	Manukyan et al. [24]	2018	2014-2016	1'000 clips from 354 consultations of 231 patients (1175 snippets from 60 conversations for training, 260 min from 6 full conversations for testing)	Random	Retrospective	Predicting conversational pauses in palliative care conversations so that human coders could clasify the pauses as connectional or not	Disease agnostic	Conversation pause as agreed upon by three human coders	17 audio features (Mel Frequency Cepstral Coefficients, zero crossing rate, energy, energy entropy, spectral entropy)	Accuracy: 0.944, Sensitivity: 0.908, Specificity: 0.945	Random forest classifier	Not mentioned	3.2 GHz Intel Core i5	Not mentioned	Not mentioned	None	American Cancer Society, Holly & Bob Miller Endowed Chair in Palliative Medicine at the Larner College of Medicine at the University of Vermont, College of Engineering & Mathematical Sciences at the University of Vermont
Validation of a Machine Learning Algorithm to Predict 180-Day Mortality for Outpatients With Cancer	Manz et al. [6]	2020	2016: Retrospective data collection for training, 2019: Prospective validation	26'525 patients for training and internal validation, 24'582 patients for prospective validation	Entirely seperate cohort	Prospective validation	Predicting 180-day mortality in an outpatient oncology cohort	Cancer	Date of death	Demographic variables, Elixhauser comorbidities, laboratory and select electrocardiogram data	Area under the receiver operating characteristic curve: 0.89	Logistic regression, random forest, gradient boosted trees	Python, scikit-learn (v. 0.15.2)	Not mentioned	https://github.com/pennsignals/eol-onc	https://github.com/pennsignals/eol-onc	Dr Bekelman reported receiving grants from Pfizer, UnitedHealth Group, North Carolina Blue Cross Blue Shield, and Embedded Healthcare; personal fees from the Centers for Medicare and Medicaid Services, Optum, CVS Health, National Comprehensive Cancer Network, and UnitedHealthcare outside the submitted work. Dr Patel reported receiving personal fees from Catalyst Health LLC, HealthMine Services, a…	Penn Center for Precision Medicine Accelerator Fund, National Institute of General Medical Sciences
Independent Validation of a Comprehensive Machine Learning Approach Predicting Survival After Radiotherapy for Bone Metastases	Nieder et al. [21]	2021	2007 - 2013 for trainig, 2009 - 2018 for external validation, 20018 for internal validation	397 patients for training, 85 patients for internal validation, 326 patients for external validation	Entirely seperate cohort	Retrospective	Predicting survival in patients receiving palliative radiation for symptomatic bone metastases	Cancer	Date of death	Patient-specific factors, disease-specific factors, treatment-specific factors,	Twenty percent of the predictions of the median survival deviated from the observed survival by at least 6 months	Random survival forests	R (v. 3.5.1)	Not mentioned	Not mentioned	From the corressponding author upon request	Various employments, stock ownership and reserach funding	Not mentioned
Radiomics analysis of pre-treatment [18F]FDG PET/CT for patients with metastatic colorectal cancer undergoing palliative systemic treatment	Van Helden et al. [29]	2018	2012-2017	52 patients (1st line), 47 patients (3rd line)	None	Retrospective	Predicting response in patients with metastatic colorectal cancer receiving 1st or 3rd line palliative chemotherapy	Metastatic colorectal cancer	Response according to RECIST v1.1	10 radiomics indices	Cluster groups had no additional predictive value compared to the individual units	Consensus hierarchical clustering	R (v. 3.2.3)	Not mentioned	Not mentioned	Not mentioned	Henk Verheul is member of the advisory board of Erbitux (Merck); he has also received honoraria from Boehringer Ingelheim and Roche for his consultancy work. Henk Verheul received research funding from Amgen, Vitromics Healthcare, Immunovo BV, Roche and Novartis.	KWF - Alpe d’Huez
Development and Validation of a Deep Learning Algorithm for Mortality Prediction in Selecting Patients With Dementia for Earlier Palliative Care Interventions	Wang et al. [12]	2019	2011-2017	26'921 patients (24'229 patients for training and 2'692 patients for testing)	Random	Retrospective	Predicting 6 month, 1 year and 2 year mortality in patients with alzheimer disease and related dementias	Alzheimer disease and related dementias	Date of death	Age, sex, race, ethnicity, educational level, marital status, clinical notes (analyzed using NLP)	Area under the receiver operating characteristic curve: 0.978 (6 months), 0.956 (1 year), 0.943 (2 years)	Recurrent neural network (long short-term memory network)	R (v. 3.5.3) for statistical analyses	Not mentioned	Not mentioned	Not mentioned	Dr Lakin reported receiving funding from the Cambia Health Foundation for a leadership award as part of the Sojourns Scholar Leadership Program. Dr Bynum reported receiving grants from the National Institutes of Health (NIH) (National Institute on Aging, National Institute of Diabetes and Digestive and Kidney Diseases, National Center for Complementary and Integrative Health), Donaghue Foundation…	Brigham Care Redesign Incubator and Startup Program, Breandeis University
Deep-Learning Approach to Predict Survival Outcomes Using Wearable Actigraphy Device Among End-Stage Cancer Patients	Yang et al. [19]	2021	2019-2020	44 patients (30 patients for training, 8 patients for validation, 6 patients for testing)	Not mentioned	Retrospective	Predicting in-hospital death of end-stage cancer patients on a hospice care unit using wristband actigraphy	End-stage cancer	Date of death	Physical activity, angle, spin	Accuracy: 0.83	Recurrent neural network (long short-term memory network)	Python (v. 3.6), R (v. 4.0.2)	Not mentioned	Not mentioned	From the corressponding author upon request	None	Ministry of Science and Technology - Taiwan, Taipei Medical University - Taiwan, Ministry of Education - Taiwan, Wanfang hospital - Taiwan
Predicting potential palliative care beneficiaries for health plans: A generalized machine learning pipeline	Zhang et al. [13]	2021	2017-2018	17'197 patients (80% for training, 20% for testing)	Stratified sampling	Retrospective	Predicting 1 year mortality in people with certain chronic health conditions from the general population	12 conditions (COPD with oxygen dependence, congestive heart failure, end-stage liver disease, pancreas cancer, brain and nervous system cancer, lung cancer, ovarian cancer, breast cancer, lymphoma and leukemia, and dementia and Alzheimer’s	Date of death	ICD codes, utilization cost (physician visits, inpatient or outpatient services, pharmacy cost), utilization pattern (hospitalization, days in hospital, prescription drugs, outpatient visits, emergency room visits, phyisician office visits), demographics (age, gender, race, ethnicity, language spoken)	Area under the receiver operating characteristic curve: 0.73 (adaBoost), 0.72 (artificial Neural network), 0.71 (decision tree)	Decision tree (DT), random forest (RF), adaBoost (AB), support vector machine (SVM), logistic regression (LR), and artificial neural network (ANN)	Python	Not mentioned	Not mentioned	Not mentioned	None	None
